# Supplementary material for: WDR76 is a RAS binding protein that functions as a tumor suppressor via RAS degradation
Source: PubMed Central journal article supplement (PMC6336889; doi:10.1038/s41467-018-08230-6), 2019-01-17
Supplement: 41467_2018_8230_MOESM1_ESM.pdf [file 41467_2018_8230_MOESM1_ESM.pdf]

## **Supplementary Information**

# **WDR76 is a RAS binding protein that functions as a tumor suppressor via RAS degradation**

**Jeong et al.**

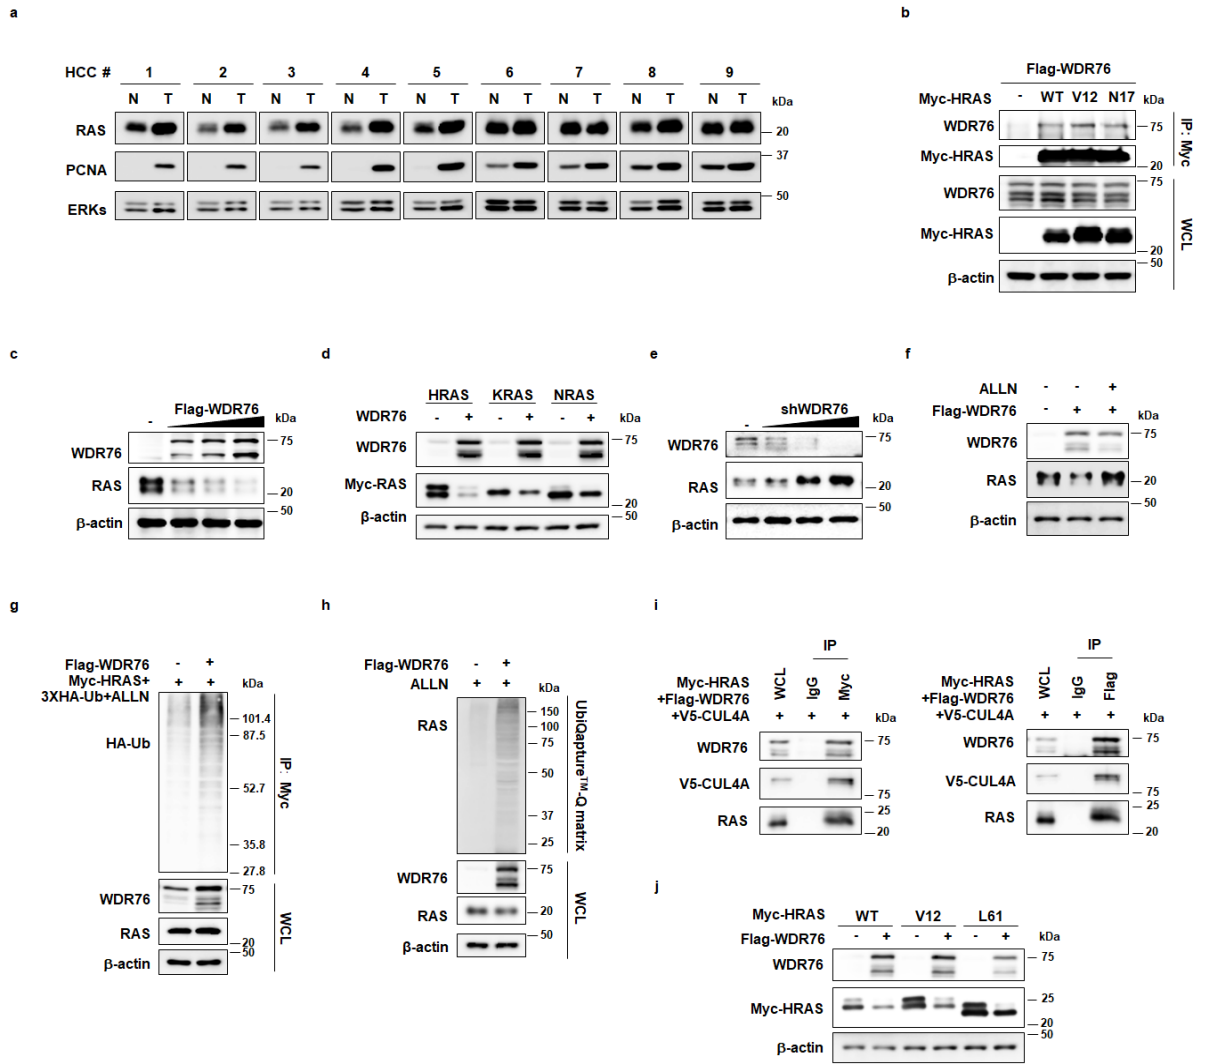

### Supplementary Figure 1. WDR76-mediated RAS protein Degradation.

**a** IB results of RAS, PCNA, and ERKs from HCC tissues (tumor and paired normal). **b** HEK293 cells were transfected with *Myc-HRAS* WT, *MycH-RAS* V12 or *MycH-RAS* N17 together with *Flag-WDR76* construct then treated with ALLN. WCLs were immunoprecipitated with anti-Myc antibody. **c** HEK293 cells were transfected with *Flag-WDR76* construct. **d** HEK293 cells were transfected with *Myc-HRAS*, *Myc-KRAS* or *Myc-NRAS* together with *Flag-WDR76* construct. **e**, HEK293 cells were transfected with *shWDR76* construct. **f** HEK293 cells were transfected with *Flag-WDR76* construct and then

treated with ALLN where indicated. **g, h** HEK293 cells were transfected with indicated vectors and then treated with ALLN. WCLs were then immunoprecipitated with an anti-Myc antibody under denaturing conditions (**g**). Ubiquitin-conjugated proteins were captured from the lysate using an UbiQapture-Q kit and blotted with anti-RAS antibody (**h**). **i** HEK293 cells were transfected with *Myc-HRAS*, *Flag-WDR76* together with *V5-CUL4A* construct then treated with ALLN. WCLs were immunoprecipitated with indicated antibodies. **j** HEK293 cells were transfected with *Myc-HRAS WT*, *Myc-HRAS V12* or *Myc-HRAS L61* together with *Flag-WDR76* construct.

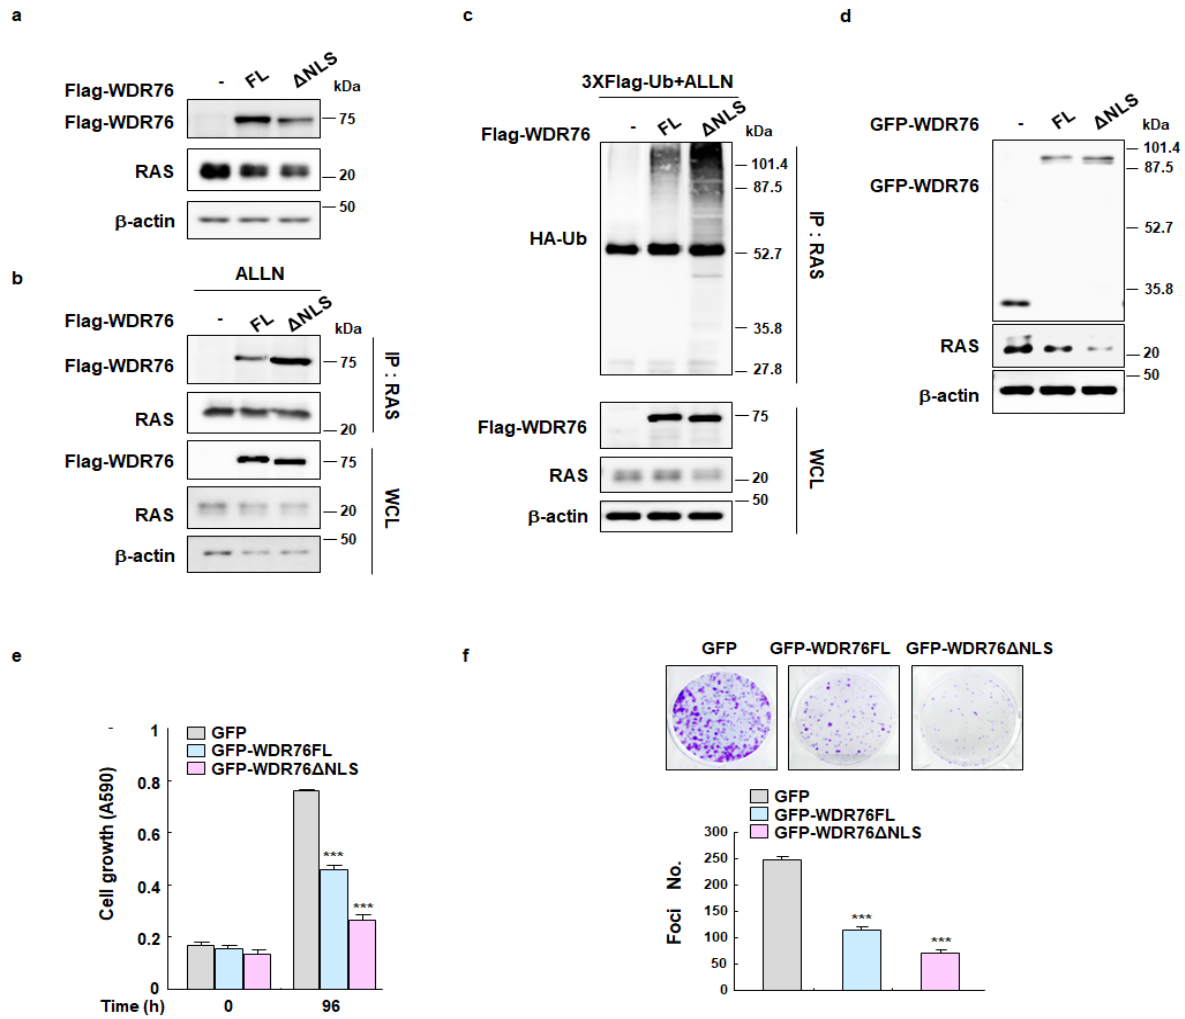

**Supplementary Figure 2. Effects of WDR76 on cell proliferation and transformation through RAS degradation.**

**a-c** HEK293 cells were transfected with indicated vectors and analyzed **(a)** or treated with ALLN **(b, c)**. WCLs were immunoprecipitated with anti-RAS antibody **(b, c)**. **d-f**, SK-hep1 cells stably expressing GFP, GFP-WDR76FL, or GFP-WDR76ΔNLS were cultured and analyzed by IB **(d)**, cell growth was assessed by MTT assay **(e)**, and foci formation assays were performed to detect cellular transformation **(f)**. Data are presented as the mean ± SD. ( $n = 3$  biological replicates). Two-sided student's  $t$  test, \*\*\*  $P < 0.001$ .

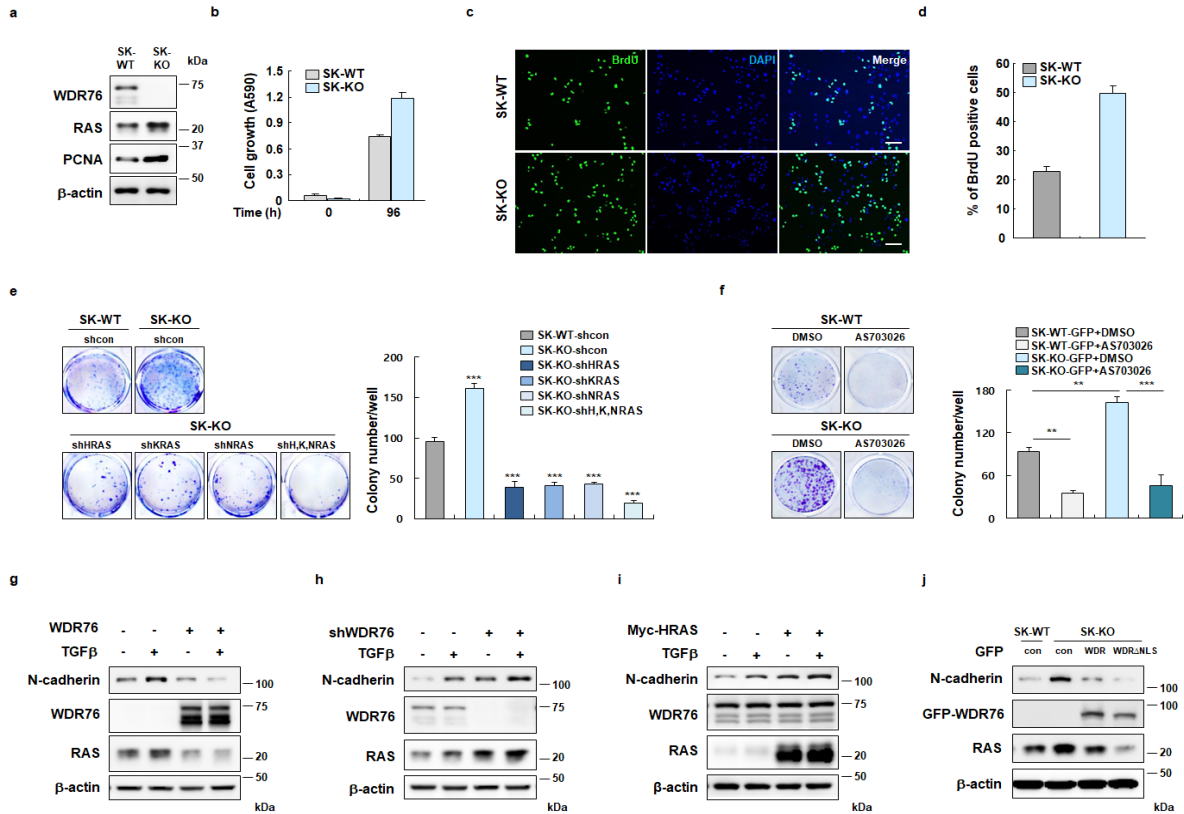

**Supplementary Figure 3. Role of WDR76 in the cell proliferation, transformation, and TGFβ-induced EMT.** **a-d** IB analyses (**a**), MTT assays (**b**), and BrdU (5-bromo-2'-deoxyuridine) incorporation assays (**c**, **d**) of the SK-WT or SK-KO cells. Scale bars, 100 μm. **e**, **f** SK-WT and SK-KO cells were transduced with indicated combinations of lentivirus encoding RAS shRNA (**e**) or were treated with DMSO or AS703026 as indicated (**f**). Cells were applied to foci formation assays and colonies were counted and plotted (right panel) as mean ± SD. ( $n = 3$  biological replicates). Two-sided student's  $t$  test, \*\* $P < 0.01$ , \*\*\* $P < 0.001$ . **g-i** SK-hep1 cells were transfected with *WDR76* (**g**), *shWDR76* construct (**h**), or HRAS (**i**) and treated with TGFβ as indicated. **j**, SK-WT-GFP, SK-KO-GFP, SK-KO-GFP-WDR76FL, or SK-KO-GFP-WDR76ΔNLS cells were cultured. IBs were performed with indicated antibodies.

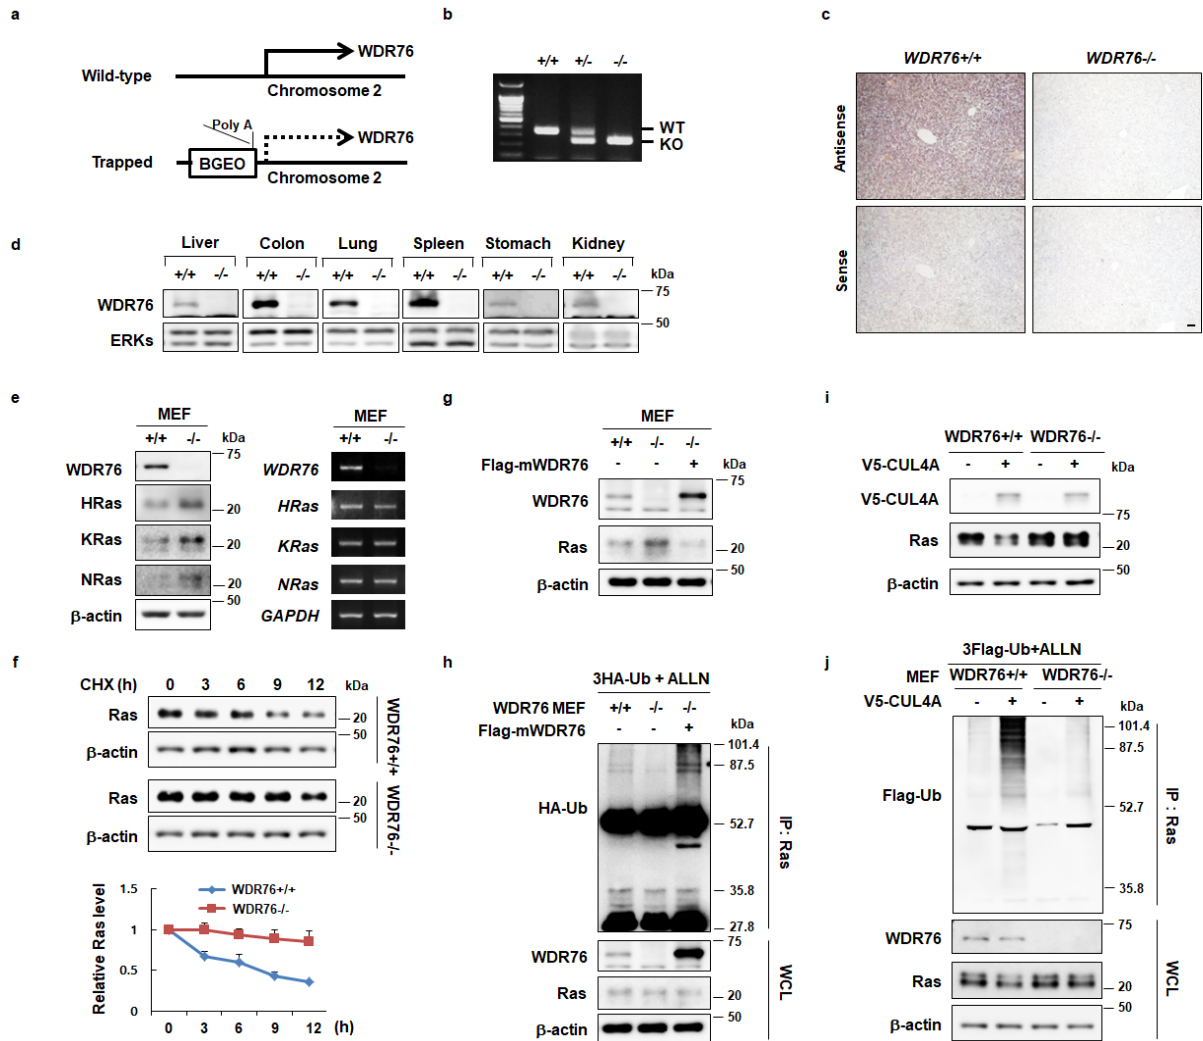

## Supplementary Figure 4. Generation of the *WDR76* knockout mouse and stabilization of Ras in *WDR76*<sup>-/-</sup> MEFs.

**a** Schematic presentation of the gene trap strategy. The *WDR76* gene is located on mouse chromosome 2. **b** PCR analysis of genomic DNA isolated from tails of WT (+/+), heterozygous (+/-), and homozygous *WDR76* KO (-/-) mice. **c** *In situ* hybridization was performed for *WDR76* in liver sections from 2-week-old *WDR76*<sup>+/+</sup> and *WDR76*<sup>-/-</sup> mice. Scale bars, 100  $\mu$ m. **d** IB examination of *WDR76* from the liver, colon, lung, spleen, stomach, and kidney tissue lysates of 2-week-old *WDR76*<sup>+/+</sup> and *WDR76*<sup>-/-</sup> mice. **e** IB (left panel) and

RT-PCR (right panel) analyses of *WDR76*<sup>+/+</sup> and *WDR76*<sup>-/-</sup> MEFs. **f** The levels of Ras at indicated time points after CHX treatment were determined by IB of the WCLs, and were quantified with  $\beta$ -actin as a loading control. The bottom panel shows plotted results for the amounts of Ras at each time point relative to the level at time 0. Data are presented as the mean  $\pm$  SD ( $n = 3$  biological replicates). **g, h** *WDR76*<sup>+/+</sup> MEFs, *WDR76*<sup>-/-</sup> MEFs or *WDR76* reintroduced *WDR76*<sup>-/-</sup> MEFs were analyzed (**g**), or were transfected with 3XHA-Ub and then treated with ALLN (**h**). WCLs were immunoprecipitated with antibody recognizing Ras. **i, j** *WDR76*<sup>+/+</sup> MEFs or *WDR76*<sup>-/-</sup> MEFs were transfected with V5-*CUL4A* together with 3XFlag-*Ub* construct then treated with ALLN as indicated (**j**). WCLs were immunoprecipitated with anti-Ras antibody.

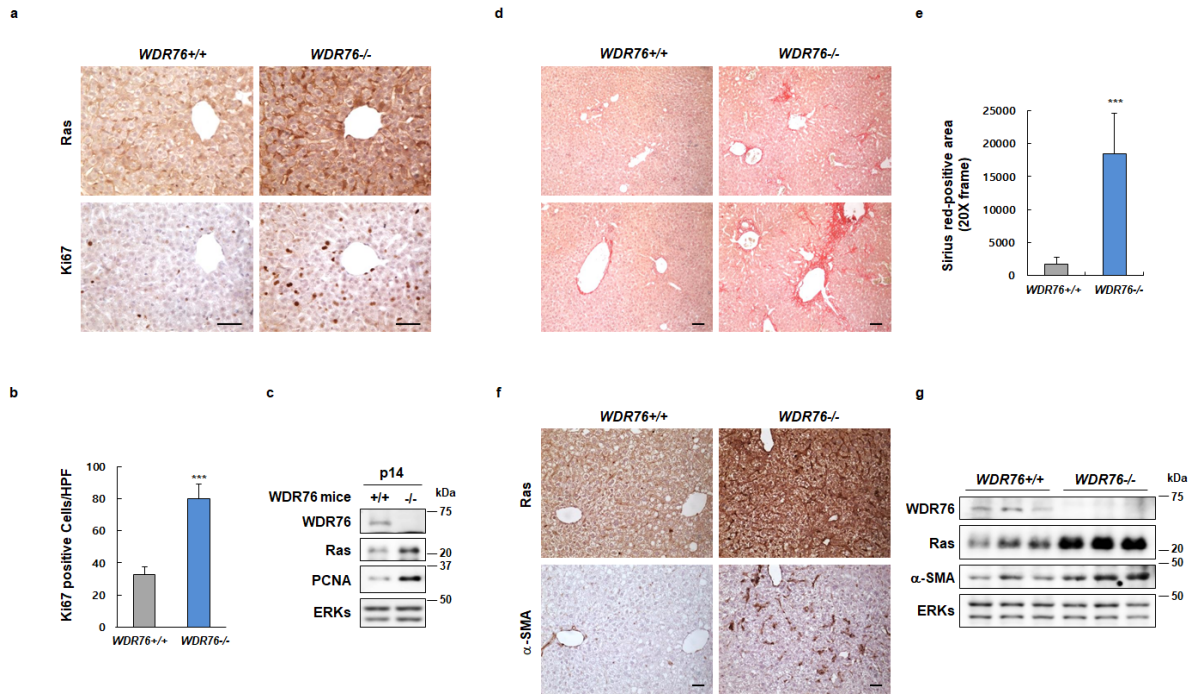

### Supplementary Figure 5. Increased hepatic fibrosis in aged *WDR76* knockout mice.

**a, b** Representative images of Ras, and Ki67 staining in liver sections from 2-week-old *WDR76*<sup>+/+</sup> or *WDR76*<sup>-/-</sup> mice (**a**). Bar graph shows the results for the numbers of Ki67 positive cells per 10 high power field (HPF) (**b**). Data are presented as the mean ± SD. Two-sided student's *t* test, \*\*\**P* < 0.001. **c** Liver tissues from 2-week-old *WDR76*<sup>+/+</sup> or *WDR76*<sup>-/-</sup> mice were subjected to immunoblot to detect indicated proteins. **d, e** Sirius red staining (**d**) and Sirius red-positive area (**e**) of liver tissues from 1-year-old *WDR76*<sup>+/+</sup> and *WDR76*<sup>-/-</sup> mice. Data are presented as the mean ± SD (*n* = 10 biological replicates). Two-sided student's *t* test, \*\*\**P* < 0.001. **f, g** IHC (**f**) and IB (**g**) analyses of liver tissues from 1-year-old *WDR76*<sup>+/+</sup> and *WDR76*<sup>-/-</sup> mice. Scale bars, 100 μm.



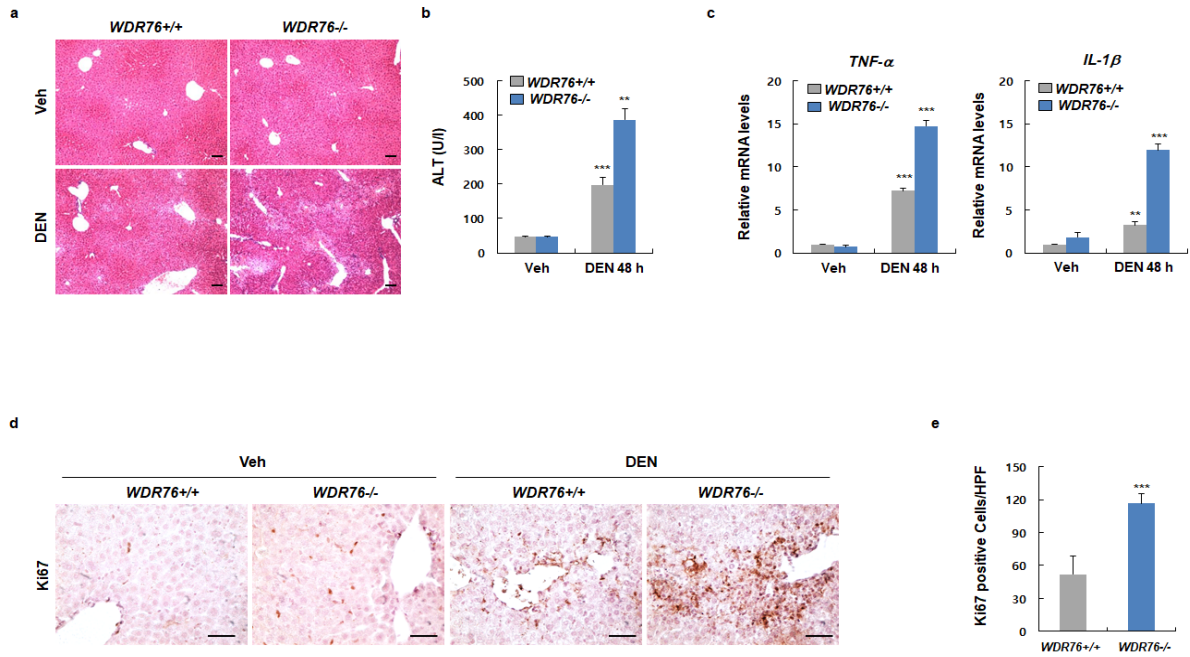

**Supplementary Fig. 6** *WDR76* knockout mouse livers are more sensitive to DEN-induced acute liver injury. **a-c** H&E staining of liver sections (**a**), ALT levels (**b**), and proinflammatory gene expression (**c**) of *WDR76*<sup>+/+</sup> and *WDR76*<sup>-/-</sup> mice that were treated with either vehicle (0.9% NaCl) or DEN at 100 mg/kg body weight. Scale bars, 200 μm. Data are presented as the mean ± SD. (*n* = 3 biological replicates). Two-sided student's *t* test, \*\* *P* < 0.01, \*\*\* *P* < 0.001. **d, e** Representative Ki67 staining of liver sections from *WDR76*<sup>+/+</sup> and *WDR76*<sup>-/-</sup> mice (**d**) and results of statistical analysis of the numbers of Ki67-positive cells per 10 HPF (**e**). Data are presented as the mean ± SD. Two-sided student's *t* test, \*\*\* *P* < 0.001. Scale bars, 100 μm.

a

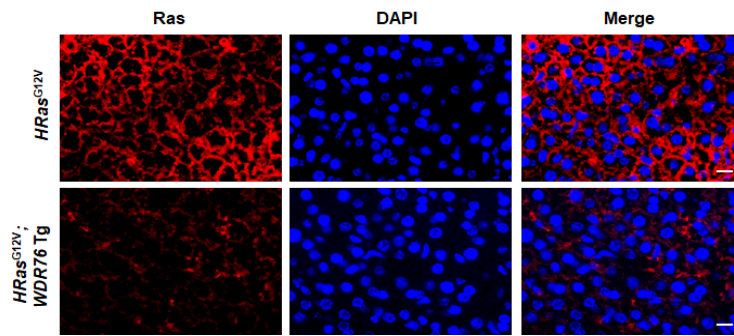

b

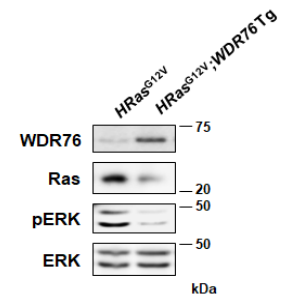

**Supplementary Fig. 7 Effect of WDR76 on the stability of RAS in livers from *HRas*<sup>G12V</sup> mice. a, b IHC (a) and IB (b) analyses of liver samples from 6-week-old *HRas*<sup>G12V</sup> or *HRas*<sup>G12V</sup>;WDR76Tg mice. Scale bar, 20  $\mu$ m.**

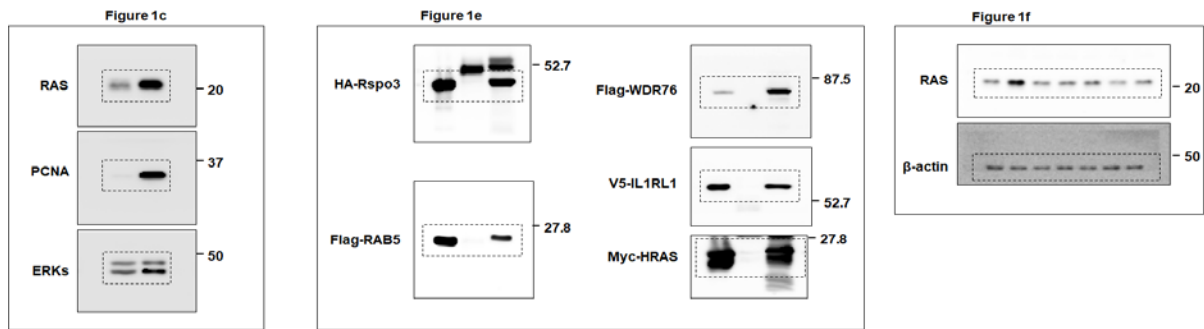

Supplementary Fig. 8 Uncropped blots for Figure 1

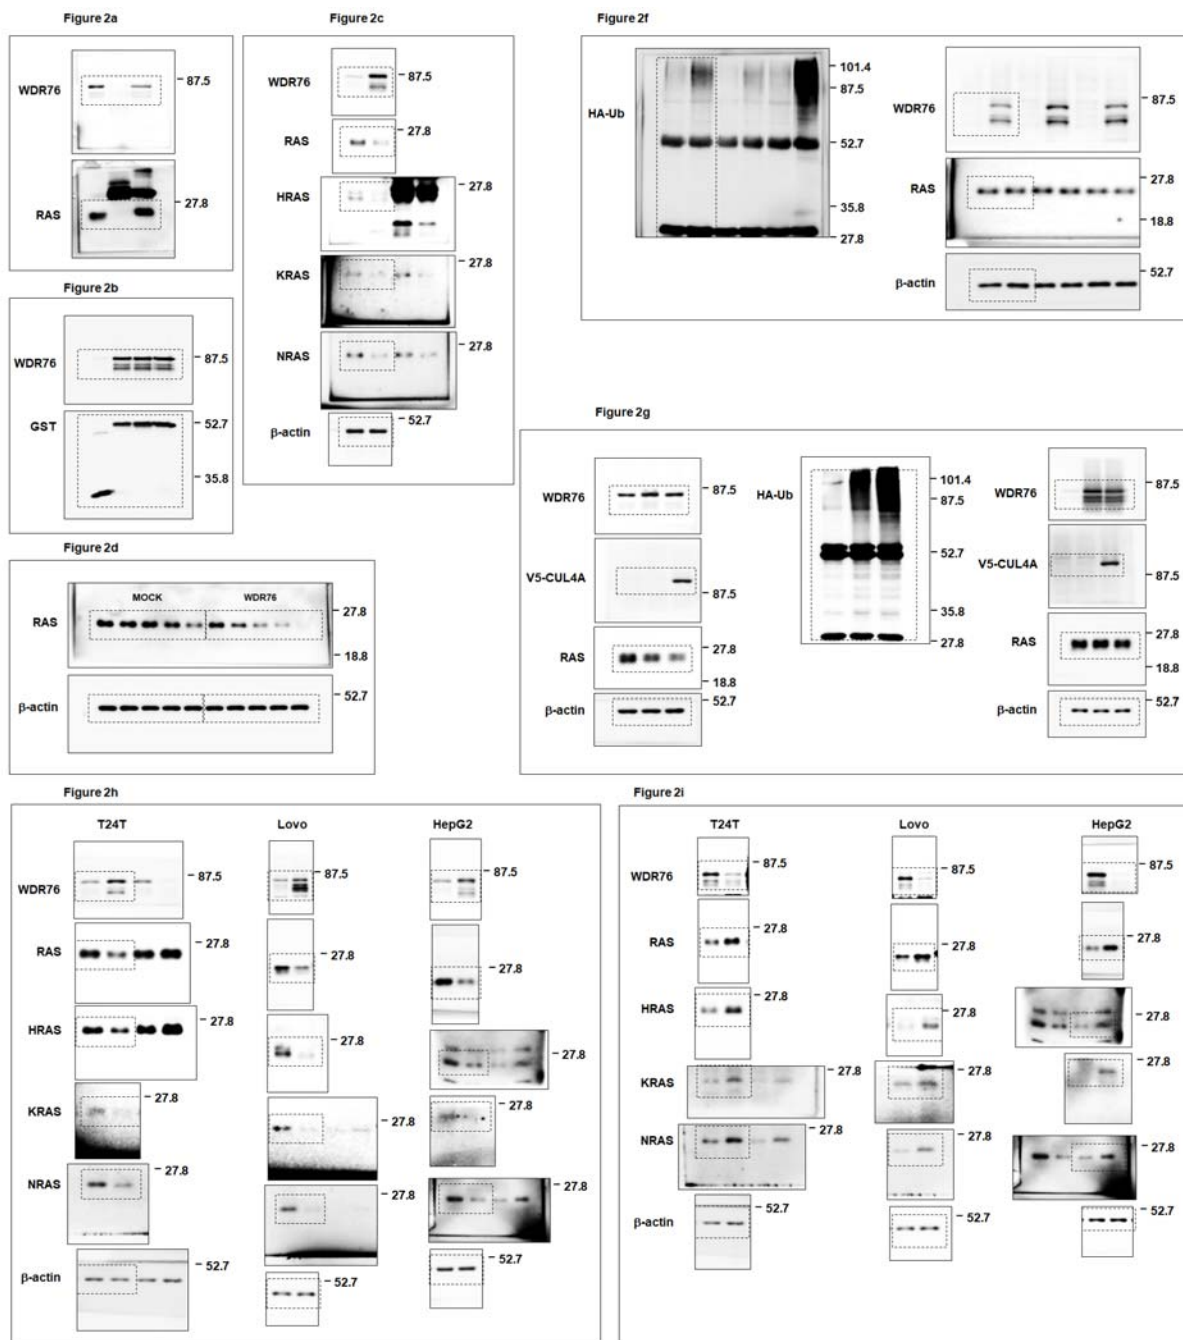

Supplementary Fig. 9 Uncropped blots for Figure 2

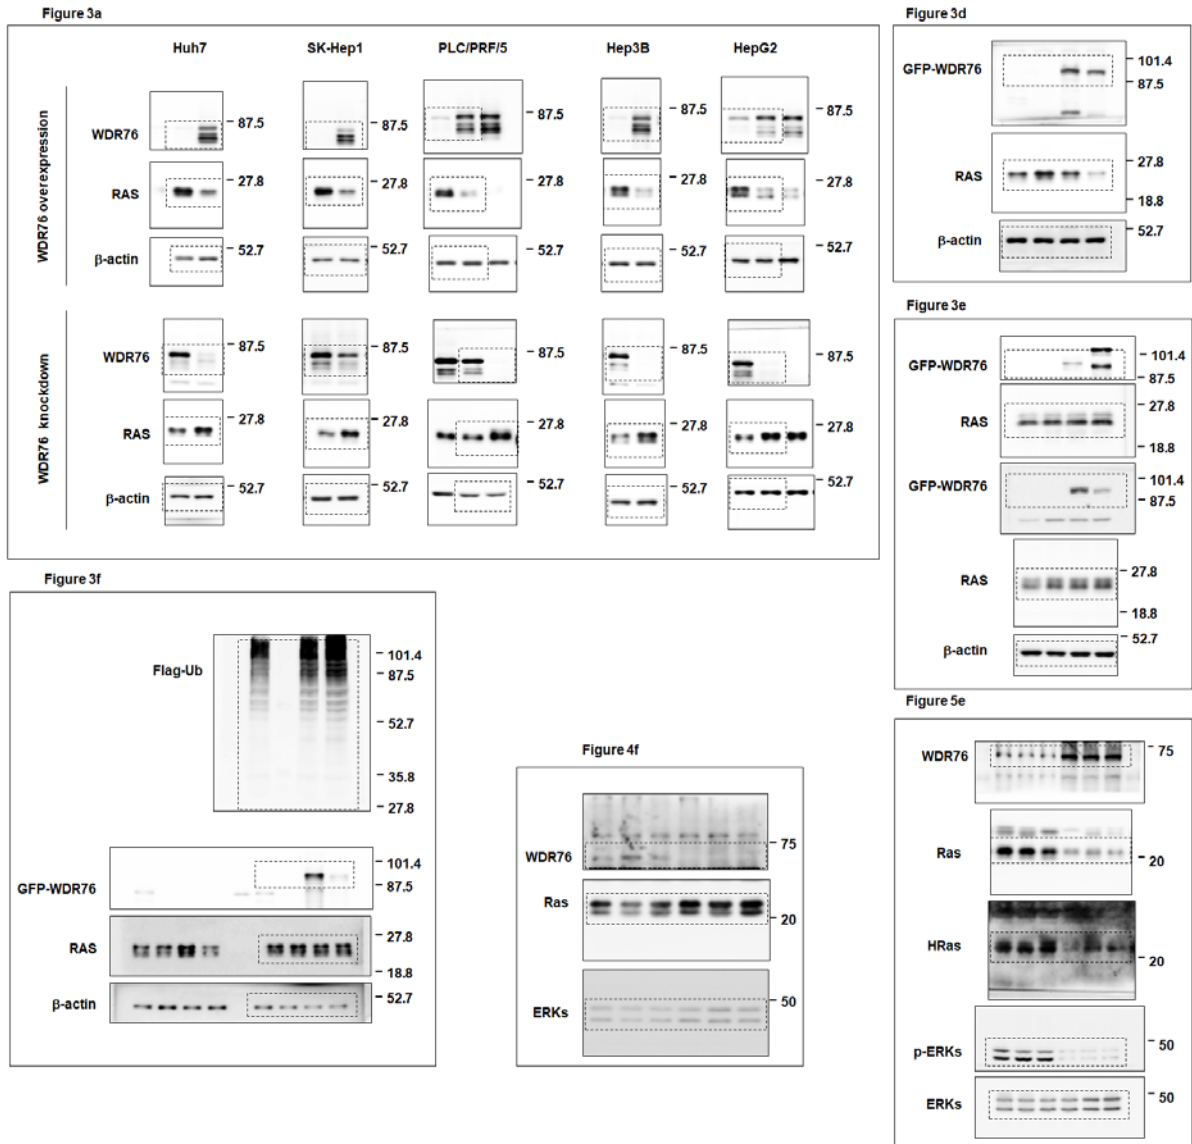

**Supplementary Fig. 10** Uncropped blots for Figure 3-5

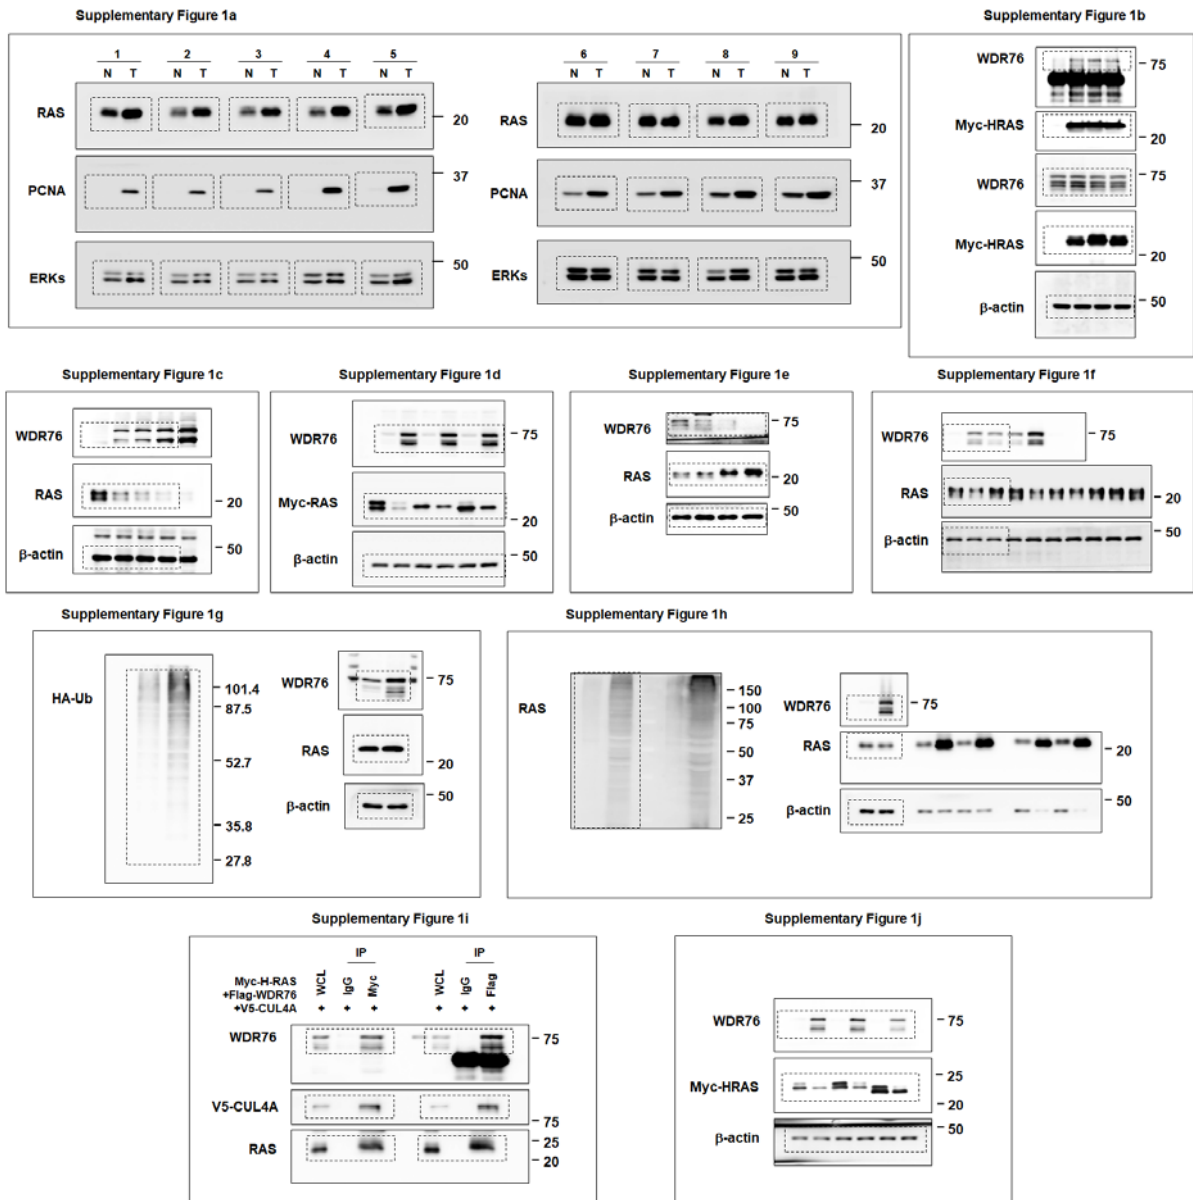

Supplementary Fig. 11 Uncropped blots for Supplementary Figure 1

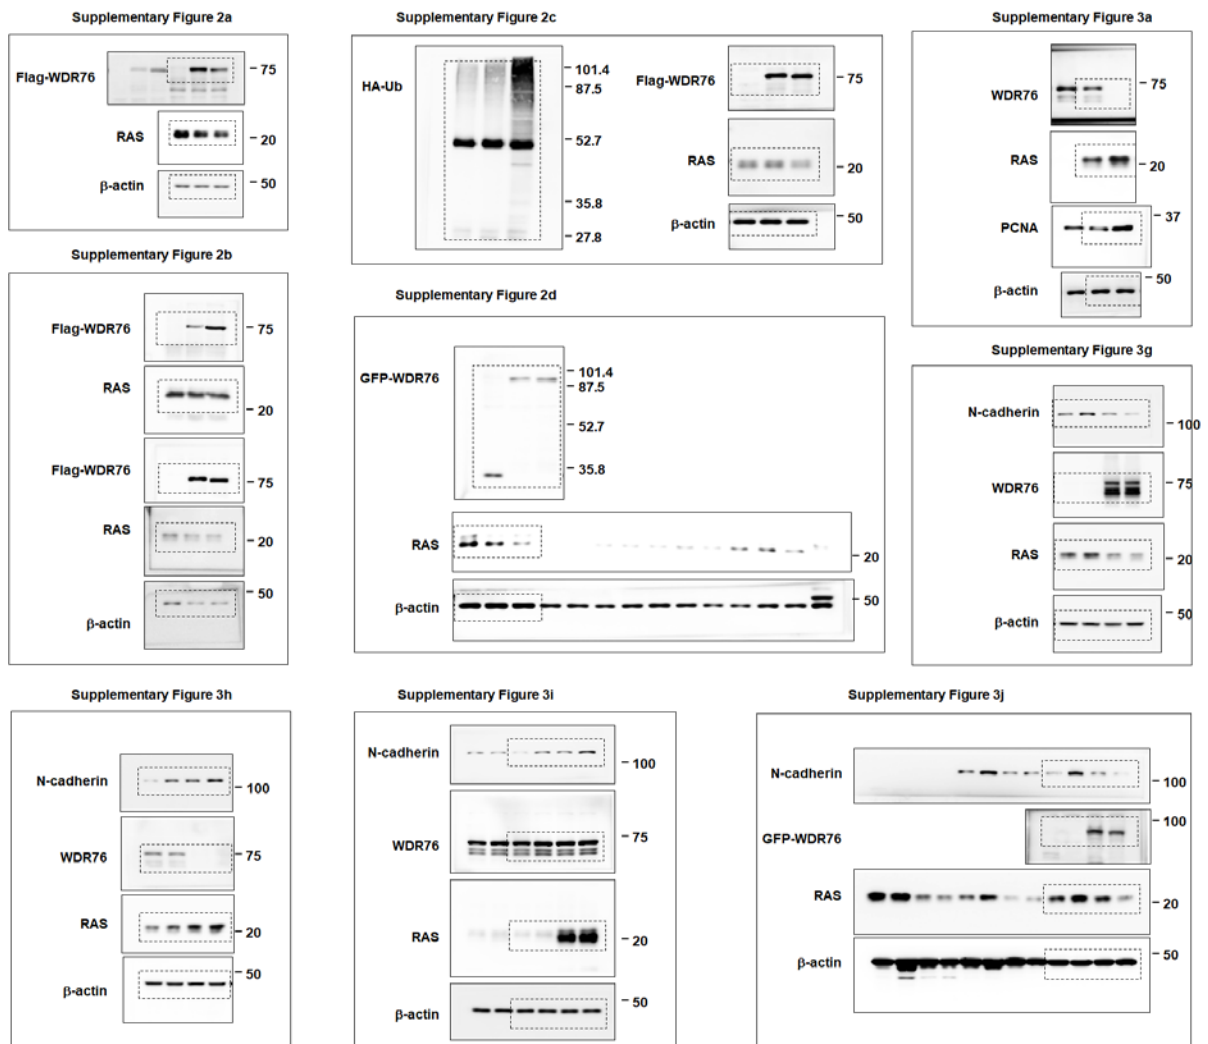

Supplementary Fig. 12 Uncropped blots for Supplementary Figure 2-3

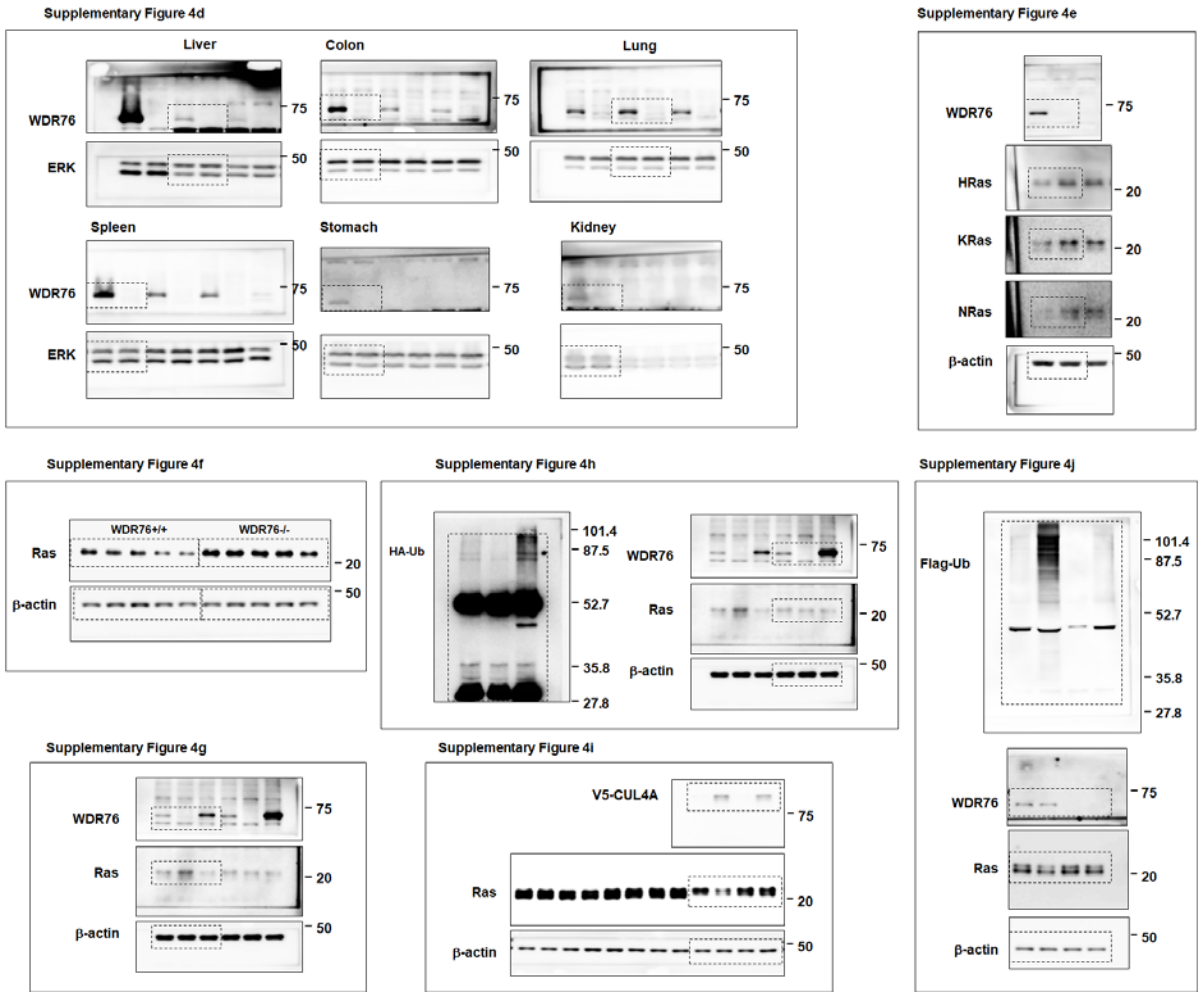

**Supplementary Fig. 13** Uncropped blots for Supplementary Figure 4



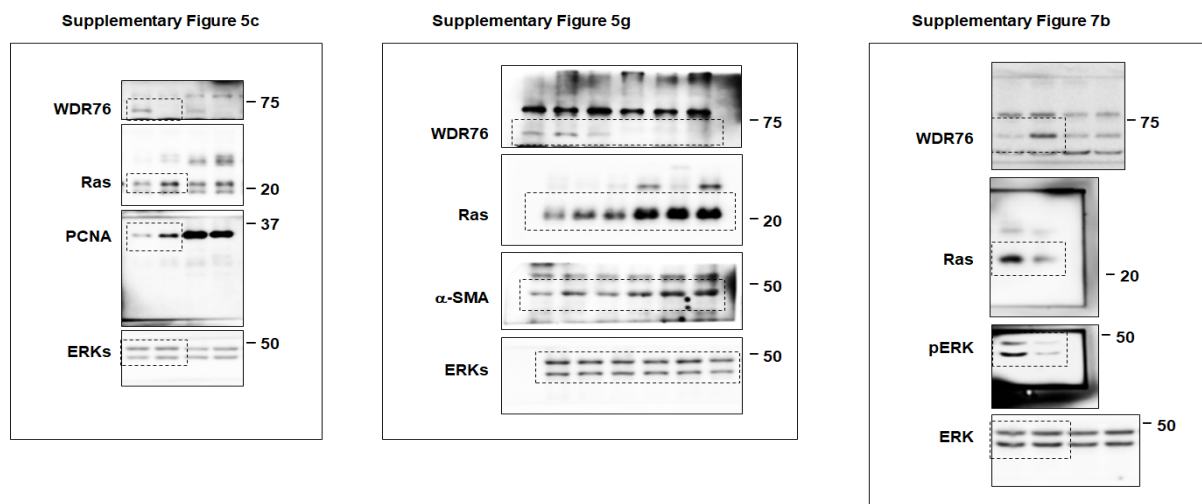

**Supplementary Fig. 14** Uncropped blots for Supplementary Figure 5 and Figure 7

## Supplementary Table 1 List of HRAS associated proteins

### Direct association with HRAS

| Protein Name                                                     | UniProtKB | Unique peptide                      | Sample (N/T) |
|------------------------------------------------------------------|-----------|-------------------------------------|--------------|
| JNK3                                                             | B3KQ94    | K.NGVVKGQSPSPAQVQQ                  | N            |
| Ras GTPase-activating protein 4                                  | O43374    | EGPLFIHRTKGGK                       | N            |
| GTPaseNras                                                       | P01111    | R.QGVEDAFYTLVR.E<br>-.GVEDAFYTLVR.E | N/T          |
| GTPaseKras                                                       | P01116    | K.LVVVGAVGVGK.S<br>K.QAQLAR.S       | N/T          |
| Receptor tyrosine-protein kinase erbB-2, Neu                     | P04626    | P.EHLGLDVPV.-                       | N            |
| Tyrosine-protein kinase Fyn                                      | P06241    | X.TPRPLPVAPGSSK.T                   | N            |
| Neurofibromatosis 1                                              | P21359    | K.EEFKALKTLSIFYQAGTSK.A             | N            |
| Ras GTPase-activating protein 2                                  | Q15283    | R.VSRCNQNR.L                        | N            |
| Dipeptidyl peptidase 9, DP9, Dipeptidyl peptidase-like protein 9 | Q86T12    | EFGLFEEELSEGSFGVWTGIR               | N            |
| Rap1-interacting adaptor molecule                                | Q7Z5R6    | R.RSSDTSGPSATPLK.A                  | N            |
| ADP-ribosylation factor GTPase activating protein 1              | B7ZBI2    | R.FASAAKEGATK.F                     | T            |
| Mitogen-activated protein kinase kinase kinase 6                 | O95382    | R.AALGVLGPVEK.E                     | T            |
| Cytosolic phospholipase A2 beta                                  | P0C869    | R.FSGAPDESGAEKR.S                   | T            |
| cAMP-specific 3',5'-cyclic phosphodiesterase 4D                  | Q08499    | MASNKFK.R                           | T            |
| Serine/threonine-protein kinase 38                               | Q15208    | K.KDTGHVYAMKILR.K                   | T            |

### Predictive association with HRAS

| Protein Name                                                              | UniProtKB | Unique peptide                  | Sample (N/T) |
|---------------------------------------------------------------------------|-----------|---------------------------------|--------------|
| Active breakpoint cluster region-related protein isoform b                | Q12979    | K.RVAEKEPINK.M                  | N            |
| Rho GTPase-activating protein 10                                          | A1A456    | K.EQLGAVKEEK.K                  | N            |
| Diacylglycerol kinase, epsilon                                            | A1L4Q0    | K.THAMMLYFSGEQTDDDISSTSDQEDIK.A | N/T          |
| G-protein signalling modulator 3 (AGS3-like, C. elegans)                  | A2BFJ3    | R.GWRLRDRPK                     | N            |
| Toll-like receptor 6                                                      | B2R933    | R.GLIHVPKDLPLK.T                | N            |
| Heat shock 70 kDa protein 12A                                             | O43301    | R.WEGGDPGVSNOQKTPHTILLTPERK.F   | N            |
| Ubiquitin conjugation factor E4 B, Ubiquitin fusion degradation protein 2 | O95155    | MAAMLNFNLQQLCGPKCR.D            | N            |
| Sulfotransferase 1A3/1A4                                                  | P50224    | K.REIQKILEFVGR.S                | N            |
| Ras-related small GTP binding protein Rab5                                | P51148    | M.AGRGGARRPNGPAAAGNK.I          | N            |
| Gamma-actin                                                               | P63261    | K.SYELPDGQVITIGNER.F            | N            |
| Keratin, type I cytoskeletal 17                                           | Q04695    | R.LSVEADINGLRR.V                | N            |
| Ankyrin repeat domain-containing protein 16                               | Q6P6B7    | MAQPGDRRL                       | N            |
| Rho guanine nucleotide exchange factor 18                                 | Q6ZSZ5    | R.IHFPNRRPR.R                   | N            |
| Ubiquitin-protein ligase E3B                                              | Q7Z3V4    | R.LISGDNAEIDLEDLKK.H            | N            |
| Zinc finger and BTB domain-containing protein 10                          | Q96DT7    | LKCPHCSYVAKYR                   | N            |
| Ubiquitin specific protease 42                                            | Q9H9J4    | R.LTESSDGGLR.R                  | N            |
| Ubiquitin specific protease 29                                            | Q9HBJ7    | K.EDMEKLNATLNTGK.E              | N            |
| Eukaryotic translation initiation factor 3 subunit L                      | Q9Y262    | K.TVSDLIDQK.V                   | N            |
| Ankyrin repeat domain-containing protein 34B                              | A5PLL1    | R.HQSIVK.D                      | T            |
| Phospholipase C, eta 2                                                    | B9D182    | M.GAMQEGMQMVK.L                 | T            |
| Cell division cycle protein 123 homolog                                   | O75794    | K.LIDKSAGGR.L                   | T            |
| Integrin beta-3                                                           | P05106    | K.SILYVVEEPECPK.G               | T            |
| Heat shock 70 kDa protein 1-like                                          | P34931    | R.IINEPTAAAIAYGLDK.G            | T            |
| PTPL1-associated RhoGAP 1                                                 | Q52LW3    | K.RVVDHAEENKMNSK.N              | T            |
| Ankyrin repeat domain 11                                                  | Q6UB99    | K.KSPFLSSAEGAVPKLDK.E           | T            |
| Ankyrin repeat domain-containing protein 23                               | Q86SG2    | R.EALQAHVAHPRT.R                | T            |
| Tetrapeptide repeat domain 21A                                            | Q8NDW8    | K.EALLWYSEAMK.L                 | T            |
| Tetrapeptide repeat protein 28                                            | Q96AY4    | K.LAEQLGRREDEAK.C               | T            |
| Phosphatidylinositol 4-kinase type II                                     | Q9BTU6    | K.LELNIVPRTK.V                  | T            |
| Anaphase promoting complex subunit 1                                      | Q9H1A4    | R.GAHSGVSLQVR.W                 | T            |
| Sorting nexin 14                                                          | Q9Y5W7    | K.KLLKAAMK.H                    | T            |

\* N: Non-Tumor, T: Tumor

**Supplementary Table 2 List of Primer sequences**

| <b>Primer</b>   | <b>Forward (5'→3')</b>  | <b>Reverse (3'→5')</b> |
|-----------------|-------------------------|------------------------|
| WDR76 (human)   | TTACGCTGTGGGGATTTTC     | GTCACCACTCTGTTACCAGTA  |
| HectD1 (human)  | ATGCTCGTGGTTATGGAAGG    | TGTGTTTGTCCACTGGCATT   |
| UBE4B (human)   | GCCAGAGCAGTGAAGGAGTC    | TATCACTGAGGCTCCGCTTT   |
| USP42 (human)   | GGGACTGGACCATTGAAAAGA   | TGAGACTGACACTGGCGAAC   |
| UBE3B (human)   | CTGTTGTGATCCAGGCCCAT    | CCAGGGACACATACCACACC   |
| USP29 (human)   | CACTGAGTCCACCAATGGCT    | GCTCCCGATATGGCTGACAA   |
| β-actin (human) | AATCTGGCACCACACCTTCTAC  | ATAGCACAGCCTGGATAGCAAC |
| GAPDH (human)   | GTCTCCTCTGACTTCAACAGCG  | ACCACCCTGTTGCTGTAGCCAA |
| HPRT (human)    | CCCTGGCGTCGTGATTAGTG    | TCGAGCAAGACGTTCACTCC   |
| HRAS (human)    | GGAAGCAGGTGGTCATTG      | AGACTTGGTGTGTTGATGG    |
| KRAS (human)    | AAACAGGCTCAGGACTTAG     | GTATAGAAGGCATCATCAACAC |
| NRAS (human)    | AAGAGTTACGGGATTCCATTC   | CCATCATCACTGCTGTTGA    |
| WDR76 (mouse)   | GTCACTGGGAGGTGGCTAAC    | GAAGACTTCCACCCGTCGTG   |
| HRas (mouse)    | ATCATCTGCCTTGCTCCT      | GACTATCCTTGTGTTGCCTAT  |
| KRas (mouse)    | CTGGTAGGGAATAAGTGTGATTI | TGTATAGAAGGCATCGTCAAC  |
| NRas (mouse)    | GCTGGTGTGAAATGACTGA     | TCGGTAAGAATCCTCTATGGT  |
| TNF-α (mouse)   | GCTCCCCAAGAAGACAGGG     | GATAGCAAATCGGCTGACGG   |
| IL-1β (mouse)   | AATGCCACCTTTTGACAGTGATG | TGGAAGGTCCACGGGAAAGA   |
| β-actin (mouse) | ATCATTGCTCCTCCTGAGCG    | ACGCAGCTCAGTAACAGTCC   |
| GAPDH (mouse)   | ACCACAGTCCATGCCATCAC    | TCCACCACCCTGTTGCTGTA   |
| HPRT (mouse)    | CAGTCCCAGCGTCGTGATTA    | TGGCCTCCCATCTCCTTCAT   |
